# Supplementary material
Source: PubMed Central journal article supplement (PMC6383781)
Supplement: NIHMS1517010-supplement-1.pdf [file NIHMS1517010-supplement-1.pdf]

## SUPPLEMENTAL TABLES

| <b>S1. Difference in medical therapy between those with normal and abnormal vasoreactivity variables</b> |                                                                     |                                       |                                    |
|----------------------------------------------------------------------------------------------------------|---------------------------------------------------------------------|---------------------------------------|------------------------------------|
| <b>Baseline Medications</b>                                                                              | <b>Coronary Flow Reserve</b>                                        |                                       |                                    |
|                                                                                                          | <b>CFR <math>\geq</math> 2.32 (n=122)</b>                           | <b>CFR &lt; 2.32 (n=77)</b>           | <b>Fisher's Exact Test p-value</b> |
| ACE-I/ARB                                                                                                | 30 (25%)                                                            | 20 (26%)                              | 0.87                               |
| Beta Blockers                                                                                            | 32 (26%)                                                            | 28 (36%)                              | 0.15                               |
| Ca Antagonists                                                                                           | 30 (25%)                                                            | 23 (30%)                              | 0.42                               |
| Nitrates                                                                                                 | 25 (20%)                                                            | 17 (22%)                              | 0.86                               |
| Statins                                                                                                  | 18 (15%)                                                            | 15 (19%)                              | 0.44                               |
| Aspirin                                                                                                  | 57 (47%)                                                            | 42 (55%)                              | 0.31                               |
| Diuretics                                                                                                | 26 (21%)                                                            | 20 (26%)                              | 0.49                               |
| Vasodilators                                                                                             | 9 (7%)                                                              | 3 (4%)                                | 0.38                               |
| <b>Baseline Medications</b>                                                                              | <b>Coronary Blood Flow</b>                                          |                                       |                                    |
|                                                                                                          | <b>CBF <math>\geq</math> 50 (n=58)</b>                              | <b>CBF &lt; 50 (n=54)</b>             | <b>Fisher's Exact Test p-value</b> |
| ACE-I/ARB                                                                                                | 15 (26%)                                                            | 17 (31%)                              | 0.54                               |
| Beta Blockers                                                                                            | 12 (21%)                                                            | 20 (37%)                              | 0.063                              |
| Ca Antagonists                                                                                           | 18 (31%)                                                            | 16 (30%)                              | 1                                  |
| Nitrates                                                                                                 | 10 (17%)                                                            | 11 (20%)                              | 0.81                               |
| Statins                                                                                                  | 8 (14%)                                                             | 15 (28%)                              | 0.10                               |
| Aspirin                                                                                                  | 23 (40%)                                                            | 31 (57%)                              | 0.09                               |
| Diuretics                                                                                                | 11 (19%)                                                            | 16 (30%)                              | 0.27                               |
| Vasodilators                                                                                             | 5 (9%)                                                              | 1 (2%)                                | 0.21                               |
| <b>Baseline Medications</b>                                                                              | <b>Change in coronary surface area in response to acetylcholine</b> |                                       |                                    |
|                                                                                                          | <b>ACH &gt; 0 (n=56)</b>                                            | <b>ACH <math>\leq</math> 0 (n=69)</b> | <b>Fisher's Exact Test p-value</b> |
| ACE-I/ARB                                                                                                | 10 (18%)                                                            | 23 (33%)                              | 0.066                              |

|                             |                                                                      |                        |                                    |
|-----------------------------|----------------------------------------------------------------------|------------------------|------------------------------------|
| Beta Blockers               | 15 (27%)                                                             | 18 (26%)               | 1                                  |
| Ca Antagonists              | 16 (29%)                                                             | 20 (29%)               | 1                                  |
| Nitrates                    | 8 (14%)                                                              | 16 (23%)               | 0.26                               |
| Statins                     | 9 (16%)                                                              | 17 (25%)               | 0.27                               |
| Aspirin                     | 22 (39%)                                                             | 37 (54%)               | 0.11                               |
| Diuretics                   | 11 (20%)                                                             | 15 (22%)               | 0.83                               |
| Vasodilators                | 2 (4%)                                                               | 6 (9%)                 | 0.29                               |
| <b>Baseline Medications</b> | <b>Change in coronary surface area in response to nitroglycerine</b> |                        |                                    |
|                             | <b>NTG &gt; 20 (n=55)</b>                                            | <b>NTG ≤ 20 (n=75)</b> | <b>Fisher's Exact Test p-value</b> |
| ACE-I/ARB                   | 11 (20%)                                                             | 24 (32%)               | 0.16                               |
| Beta Blockers               | 19 (35%)                                                             | 17 (23%)               | 0.17                               |
| Ca Antagonists              | 16 (29%)                                                             | 24 (32%)               | 0.85                               |
| Nitrates                    | 11 (20%)                                                             | 16 (21%)               | 1                                  |
| Statins                     | 10 (18%)                                                             | 16 (21%)               | 0.82                               |
| Aspirin                     | 24 (44%)                                                             | 39 (53%)               | 0.37                               |
| Diuretics                   | 12 (22%)                                                             | 13 (17%)               | 0.65                               |
| Vasodilators                | 2 (4%)                                                               | 6 (8%)                 | 0.47                               |

| <b>S2. Difference in medical therapy between those with events and no events</b> |                                 |                                                     |                         |
|----------------------------------------------------------------------------------|---------------------------------|-----------------------------------------------------|-------------------------|
| <b>Medications</b>                                                               | <b>NO event, n=181 possible</b> | <b>Event (Death, MI, stroke, HF), n=43 possible</b> | <b>log rank P value</b> |
| ACE-I/ARB                                                                        | 42 (23%)                        | 12 (28%)                                            | 0.6                     |
| Beta Blockers                                                                    | 48 (27%)                        | 17 (40%)                                            | 0.08                    |
| Calcium channel blockers                                                         | 42 (23%)                        | 16 (37%)                                            | <b>0.047</b>            |
| Nitrates                                                                         | 32 (18%)                        | 15 (35%)                                            | <b>0.004</b>            |
| Statins                                                                          | 24 (13%)                        | 14 (33%)                                            | <b>0.003</b>            |
| Aspirin                                                                          | 85 (47%)                        | 25 (28%)                                            | 0.25                    |

| <b>S3. Difference in medical therapy between those with events and no events stratified by the presence of obstructive CAD</b> |                        |                                            |                         |                            |                                            |                         |
|--------------------------------------------------------------------------------------------------------------------------------|------------------------|--------------------------------------------|-------------------------|----------------------------|--------------------------------------------|-------------------------|
| <b>Medications</b>                                                                                                             | <b>Obstructive CAD</b> |                                            |                         | <b>Non-Obstructive CAD</b> |                                            |                         |
|                                                                                                                                | <b>No event, n=30</b>  | <b>Event (Death, MI, stroke, HF), n=13</b> | <b>log rank P value</b> | <b>No Event, n=149</b>     | <b>Event (Death, MI, stroke, HF), n=30</b> | <b>log rank P value</b> |
| ACE-I/ARB                                                                                                                      | 12 (40%)               | 8 (62%)                                    | 0.3244                  | 29 (19%)                   | 4 (13%)                                    | 0.4027                  |
| Beta Blockers                                                                                                                  | 11 (37%)               | 9 (69%)                                    | 0.0897                  | 37 (25%)                   | 8 (27%)                                    | 0.6914                  |
| Calcium channel blockers                                                                                                       | 8 (27%)                | 4 (31%)                                    | 0.7232                  | 34 (23%)                   | 12 (40%)                                   | <b>0.0362</b>           |
| Nitrates                                                                                                                       | 9 (30%)                | 7 (54%)                                    | 0.2364                  | 23 (15%)                   | 8 (27%)                                    | <b>0.0384</b>           |
| Statins                                                                                                                        | 6 (20%)                | 6 (46%)                                    | 0.1866                  | 18 (12%)                   | 8 (27%)                                    | <b>0.0272</b>           |
| Aspirin                                                                                                                        | 26 (87%)               | 8 (62%)                                    | 0.0768                  | 58 (39%)                   | 17 (57%)                                   | 0.1010                  |
